# Supplementary material for: Dynamical insights into the differential characteristics of Mycobacterium avium subsp. paratuberculosis peptide binding to HLA-DRB1 proteins associated with multiple sclerosis
Source: Royal Society of Chemistry journal article supplement (doi:10.1039/c4nj01903b), 2014-12-08
Supplement: c4nj01903b1.pdf [file c4nj01903b1.pdf]

**Supplementary materials for the manuscript:**

**Dynamical Insights into *Mycobacterium avium* subsp. *paratuberculosis* peptide binding differential characteristics to HLA-DRB1 proteins associated to Multiple Sclerosis**

Amit Kumar<sup>a,b,\*</sup>, Leonardo A Sechi<sup>c</sup>, Pierluigi Caboni<sup>d</sup>, Maria Giovanna Marrosu<sup>e</sup>, Luigi Atzori<sup>b</sup>, Enrico Pieroni <sup>a,\*</sup>

<sup>a</sup> CRS4 Science and Technology Park Polaris, Biomedicine Dept., Piscina Manna, 09010, Pula (CA) Italy.

<sup>b</sup> Department of Biomedical Sciences, Oncology and Molecular Pathology Unit, University of Cagliari, Cagliari, 09100, Italy.

<sup>c</sup> Department of Biomedical Sciences, Microbiology and Virology Unit, University of Sassari, Sassari, Italy.

<sup>d</sup> Department of Life and Environmental Sciences, University of Cagliari, Cagliari, Italy.

<sup>e</sup> Multiple Sclerosis Center, Department of Public Health and Clinical and Molecular Medicine, University of Cagliari, Cagliari, 09100, Italy.

\*Corresponding authors

Dr. Amit Kumar  
Visiting Scientist, Biomedicine Dept.  
CRS4 Science and Technology Park Polaris,  
Piscina Manna, Pula (CA). 09010.  
Italy.  
Tel. +39-070-9250355  
Email. [amit369@gmail.com](mailto:amit369@gmail.com), [akumar@crs4.it](mailto:akumar@crs4.it)

## Section 1 Supplementary Tables

**Table S1. Details of Simulation system**

| System | Box Size   | No of water | Total of atoms |
|--------|------------|-------------|----------------|
| *03:01 | [86 86 74] | 14975       | 50939          |
| *15:01 | [76 90 81] | 15025       | 51217          |
| *16:01 | [77 96 75] | 15078       | 51429          |
| *15:02 | [78 96 76] | 15083       | 51434          |

**Table S2. Cluster analysis on HLA peptide binding groove residues.** Grouping of binding groove conformational states and population probability (in %) in different clusters from dPCA is reported. We also report the fluctuations (in Å) between binding groove structures in the same cluster. Absence of a cluster is denoted by symbol x.

| Clusters | C-1 |     | C-2 |     | C-3 |     | C-4 |     | C-5 |     |
|----------|-----|-----|-----|-----|-----|-----|-----|-----|-----|-----|
|          | %   | Å   | %   | Å   | %   | Å   | %   | Å   | %   | Å   |
| *03:01   | 18  | 1.2 | 8   | 1.1 | 2   | 1.0 | 0.8 | 1.2 | x   | x   |
| *15:01   | 18  | 1.0 | 6   | 0.9 | 4   | 1.0 | 1   | 1.1 | 0.7 | 0.9 |
| *16:01   | 27  | 1.2 | 12  | 1.1 | 9   | 1.0 | 4   | 1.0 | 0.9 | 0.8 |
| *15:02   | 27  | 1.1 | 10  | 1.1 | 2   | 1.0 | x   | x   | x   | x   |

**Table S3. H-bond between MAP and DRB1 residues.** In the third column “REF” refers to H-bonds present (represented with symbol ✓) in our starting MD structure, and if absent with a X symbol. The fourth column “MD” refers the percentage of trajectory frames that satisfy the H-bond criteria during 100 ns of MD simulations. In (A) for \*03:01 predisposing protein in (B) for \*15:01 predisposing protein, in (C) for \*16:01 protective protein and in (D) for \*15:02 protective protein.

(A)

| MAP  | DRB1*03:01         | REF           | MD                   |
|------|--------------------|---------------|----------------------|
| D301 | H81                | ✓             | 57.5                 |
| T303 | N82                | ✓             | 61.2                 |
| N305 | Y26, R74, Y78      | ✓, ✓, ✓       | 91.5, 8.3, 52.9      |
| V306 | K71, R74           | ✓, X          | 23.8, 11.2           |
| K307 | S11, T12, R29, Y30 | ✓, X, X,<br>✓ | 8.9, 50.5, 16.4, 3.5 |
| G308 | Y30                | ✓             | 4.9                  |
| D309 | Y60, Q64           | X, X          | 36.3, 20.2           |

(B)

| MAP  | DRB1*15:01 | REF  | MD         |
|------|------------|------|------------|
| D301 | H81        | ✓    | 78.2       |
| T303 | N82, H81   | ✓, X | 90.4, 3.3  |
| N305 | R13, Q70,  | X, ✓ | 17.9, 12.3 |
| V306 | R13, Q70,  | ✓, X | 97.9, 25.8 |
| G308 | W61        | X    | 2.3        |
| D309 | Y60, Q64   | ✓, X | 79.8, 69.2 |

(C)

| MAP  | DRB1*16:01    | REF     | MD               |
|------|---------------|---------|------------------|
| D301 | H81           | ✓       | 72.4             |
| T303 | N82, T77      | ✓, X    | 83.2, 21.9       |
| N305 | R13, D28, R71 | ✓, ✓, X | 84.9, 48.2, 16.2 |
| V306 | R13, R71      | ✓, ✓    | 2.3, 98.9        |
| D309 | W61, Y60      | ✓, X    | 5.8, 35.5        |

(D)

| MAP  | DRB1*15:02 | REF   | MD         |
|------|------------|-------|------------|
| D301 | H81        | ✓     | 50.9       |
| T303 | N82, H81   | ✓, X  | 90.8, 16.2 |
| N305 | R13, F26   | ✓, ✓  | 3.6, 2.3   |
| V306 | R13, Q70   | ✓, ✓  | 88.9, 21.4 |
| K307 | D28, Y30   | X, X  | 2.2, 18.8  |
| G308 | D66, Q70   | X, X  | 7.3, 7.4   |
| D309 | W61, Y60   | ✓, X, | 57.2, 35.5 |

## Section 2 Supplementary Figures

**Fig. S1. RMSD plot vs simulation time.** RMSD of C-alpha atoms of binding groove residues as function of simulation time is shown here.

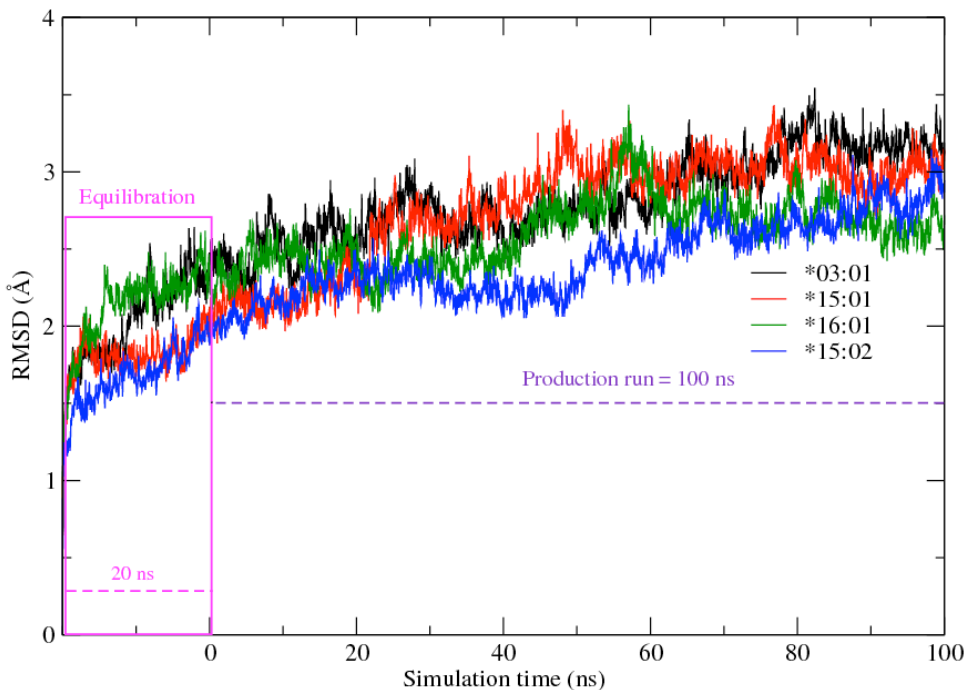

**Fig. S2 RMSD probability distribution for \*03:01 protein complex.**

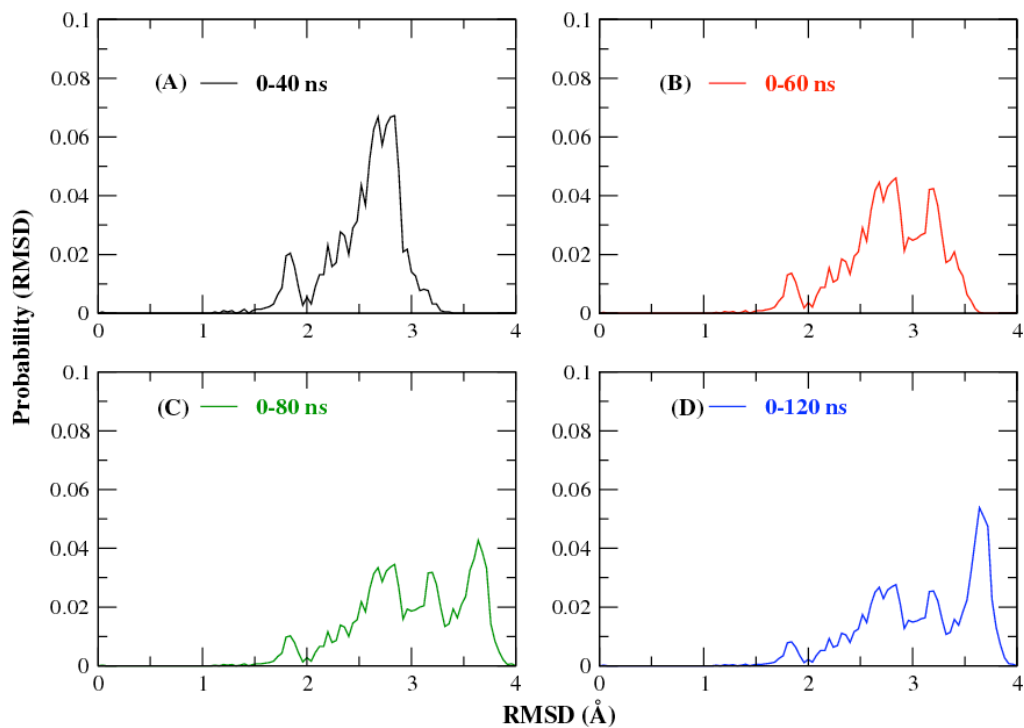

**Fig. S3. Good-Turing convergence test.** Probability<sub>unobserved</sub> (RMSD) of unobserved configurations as a function of RMSD distance.

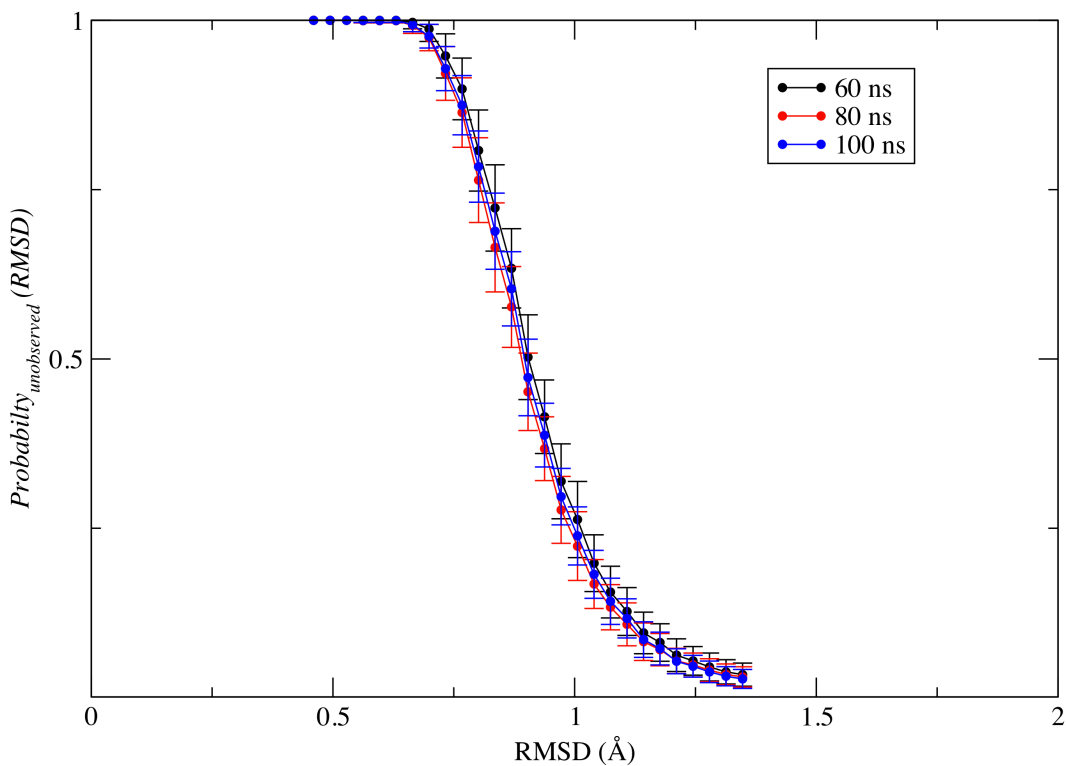

**Fig. S4. Binding groove conformations during MD simulations for \*03:01 and \*15:01 molecular systems along the top two principal components.**

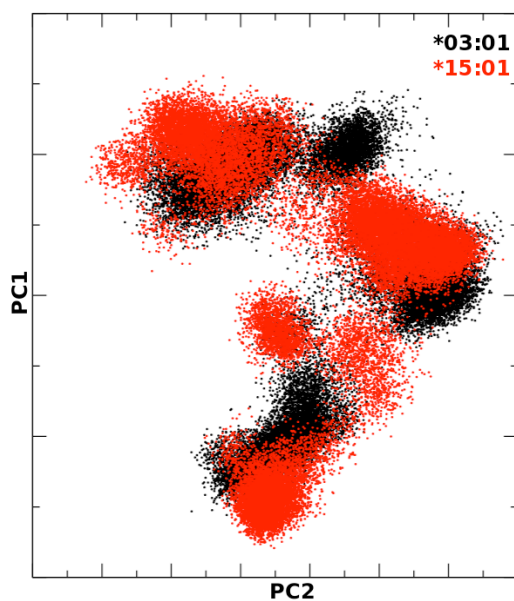

**Fig. S5. Cross correlation matrices of C-alpha fluctuations.** In (A) protective protein \*16:01 and in (B) predisposing protein. The color gradient for low values of correlation (dark blue), medium correlation (yellow) and high correlation (dark red), with origin at low left corner.

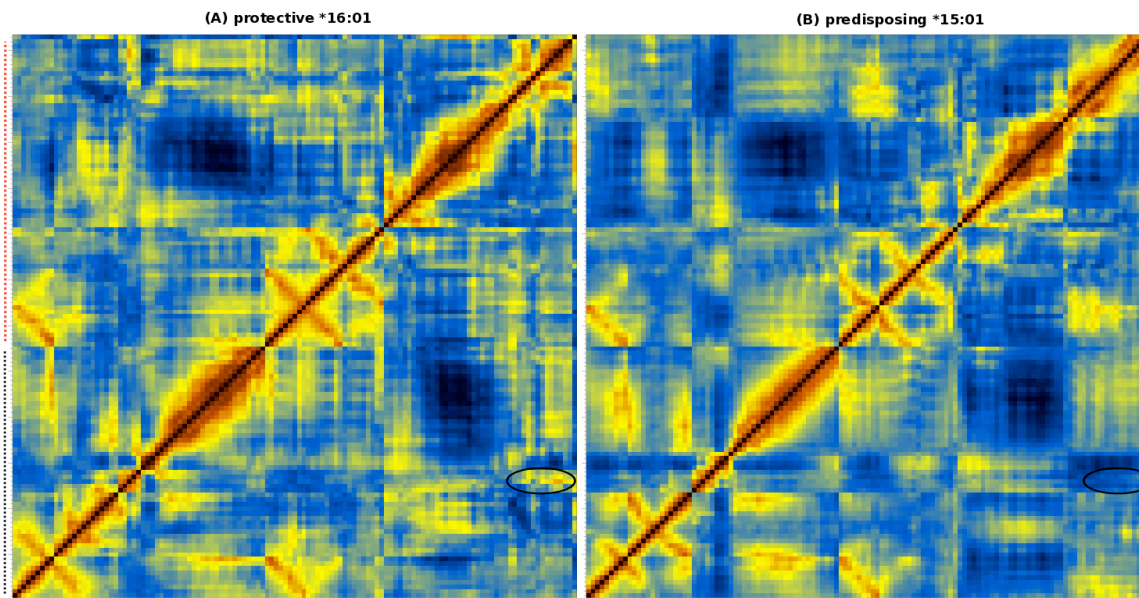

**Fig. S6. Configurational Entropy estimation.** Entropy calculation at different time intervals for MAP complexed to \*15:01 protein.

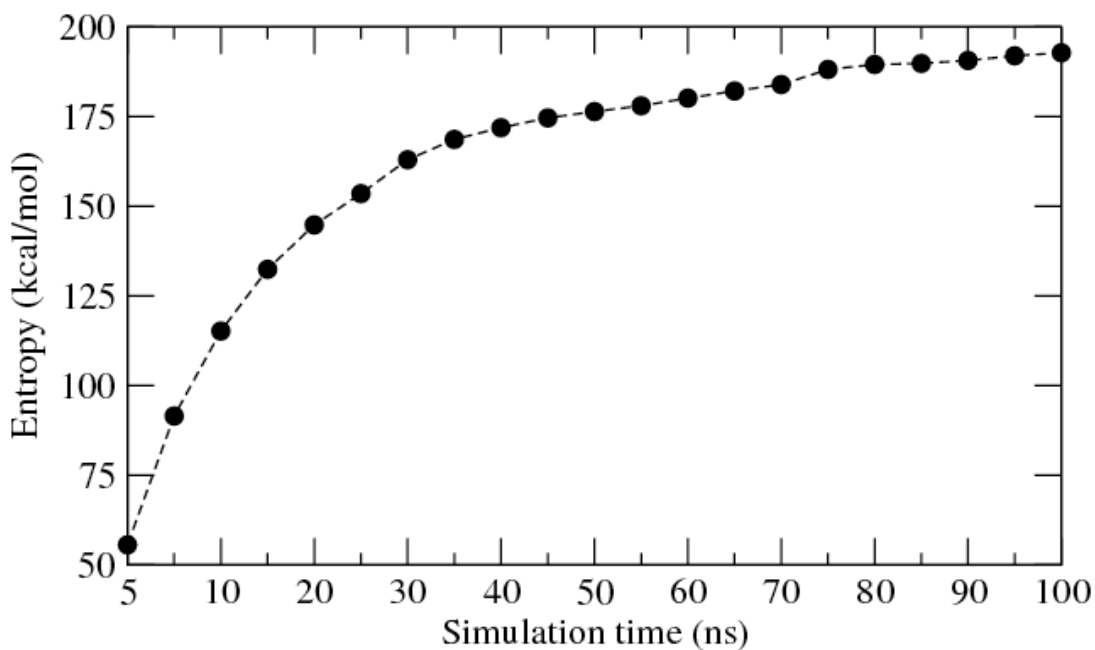

### Section 3. Molecular Dynamics simulation of \*16:01 protective protein with \*15:01 as template

As no X-ray structures are available for the protective proteins investigated in our study, therefore the structures were homology modeled previously using same template (\*01:01) for the two protective proteins. To rule out a potential bias in choice of our template structure, we repeated MD simulations for the \*16:01 protein, in this case modeled using \*15:01 (1BX2) as template. We summarize the analysis of \*16:01 simulations using the two template X-ray structures (i) \*01:01 (pdb: 3PDO) (ii) \*15:01 (pdb: 1BX2).

| MAP  | DRB1*16:01 | *01:01 template | *15:01 template |
|------|------------|-----------------|-----------------|
| D301 | H81        | ✓               | ✓               |
| T303 | T77, N82   | ✓, ✓            | ✓, ✓            |
| N305 | R13, D28   | ✓, ✓            | ✓, ✓            |
| V306 | R71        | ✓               | ✓               |
| G308 | W61        | X               | ✓               |
| D309 | Y60        | ✓               | ✓               |

**Table S4.** Persistent H-bond interaction between peptide and DRB1 residues

Only difference in between the two simulations is noted in additional H-bond interaction observed for \*15:01 template simulation involving interacting pair G308-W61.



| <b>DRB1*16:01</b>                  | <b>*01:01<br/>template</b> | <b>*15:01<br/>template</b> |
|------------------------------------|----------------------------|----------------------------|
| $\Delta G_{(SIE)}$ (kcal/mol)      | $-10.1 \pm 0.7$            | $-10.8 \pm 0.6$            |
| Configurational Entropy (kcal/mol) | 168                        | 178                        |
| Buried Surface area                | $545 \pm 40$               | $580 \pm 28$               |

**Table S5.** Physicochemical properties analysis.

We observed a slightly higher value for binding free energy, configurational entropy and buried surface area estimations for \*16:01 protective protein complex simulations using \*15:01 as template structure. The difference in values noted for the binding energy estimation and buried surface area calculations are within the error estimates. Moreover, the comparison with the predisposing proteins simulations results as consistent for either choice of the template in our MD simulations.
